# Supplementary material for: Experience-Dependent Changes in Myelin Basic Protein Expression in Adult Visual and Somatosensory Cortex
Source: PubMed Central journal article supplement (PMC7098538; doi:10.3389/fncel.2020.00056), 2020-03-17
Supplement: Data_Sheet_2.pdf [file Data_Sheet_2.pdf]

|             |               | Pearson's R |          |         |         |               |         |         | P-value  |          |        |        |               |        |        | FDR adjusted P-threshold |
|-------------|---------------|-------------|----------|---------|---------|---------------|---------|---------|----------|----------|--------|--------|---------------|--------|--------|--------------------------|
|             |               | Synapsin    | Gephyrin | PSD95   | UBE3A   | Synaptophysin | GluA2   | MBP     | Synapsin | Gephyrin | PSD95  | UBE3A  | Synaptophysin | GluA2  | MBP    | (q = 0.10)               |
| Normal      | Synapsin      | 1.0000      | 0.6649   | 0.7753  | 0.8931  | 0.0303        | 0.4090  | 0.0536  |          | 0.1496   | 0.0700 | 0.0165 | 0.9545        | 0.4207 | 0.9196 | 0.0190                   |
|             | Gephyrin      | 0.6649      | 1.0000   | 0.9268  | 0.9192  | 0.4807        | 0.6020  | 0.5357  | 0.1496   |          | 0.0078 | 0.0095 | 0.3345        | 0.2061 | 0.2733 |                          |
|             | PSD95         | 0.7753      | 0.9268   | 1.0000  | 0.9585  | 0.4323        | 0.3867  | 0.4008  | 0.0700   | 0.0078   |        | 0.0025 | 0.3919        | 0.4488 | 0.4310 |                          |
|             | UBE3A         | 0.8931      | 0.9192   | 0.9585  | 1.0000  | 0.2655        | 0.5257  | 0.3909  | 0.0165   | 0.0095   | 0.0025 |        | 0.6112        | 0.2841 | 0.4435 |                          |
|             | Synaptophysin | 0.0303      | 0.4807   | 0.4323  | 0.2655  | 1.0000        | -0.1690 | -0.0273 | 0.9545   | 0.3345   | 0.3919 | 0.6112 |               | 0.7490 | 0.9591 |                          |
|             | GluA2         | 0.4090      | 0.6020   | 0.3867  | 0.5257  | -0.1690       | 1.0000  | 0.4166  | 0.4207   | 0.2061   | 0.4488 | 0.2841 | 0.7490        |        | 0.4113 |                          |
|             | MBP           | 0.0536      | 0.5357   | 0.4008  | 0.3909  | -0.0273       | 0.4166  | 1.0000  | 0.9196   | 0.2733   | 0.4310 | 0.4435 | 0.9591        | 0.4113 |        |                          |
| FLX         | Synapsin      | 1.0000      | 0.2227   | 0.2123  | 0.4170  | 0.5481        | -0.7729 | -0.0789 |          | 0.5960   | 0.5960 | 0.6138 | 0.3041        | 0.1596 | 0.0245 | 0.8526                   |
|             | Gephyrin      | 0.2227      | 1.0000   | 0.9257  | 0.8068  | -0.0677       | -0.6222 | 0.5033  | 0.5960   |          | 0.0010 | 0.0155 | 0.8734        | 0.0995 | 0.2035 |                          |
|             | PSD95         | 0.2123      | 0.9257   | 1.0000  | 0.8636  | -0.2587       | -0.6408 | 0.3402  | 0.6138   | 0.0010   |        | 0.0057 | 0.5362        | 0.0869 | 0.4096 |                          |
|             | UBE3A         | 0.4170      | 0.8068   | 0.8636  | 1.0000  | 0.0461        | -0.5498 | 0.2244  | 0.3041   | 0.0155   | 0.0057 |        | 0.9136        | 0.1580 | 0.5932 |                          |
|             | Synaptophysin | 0.5481      | -0.0677  | -0.2587 | 0.0461  | 1.0000        | -0.2252 | 0.3865  | 0.1596   | 0.8734   | 0.5362 | 0.9136 |               | 0.5918 | 0.3443 |                          |
|             | GluA2         | -0.7729     | -0.6222  | -0.6408 | -0.5498 | -0.2252       | 1.0000  | -0.2324 | 0.0245   | 0.0995   | 0.0869 | 0.1580 | 0.5918        |        | 0.5797 |                          |
|             | MBP           | -0.0789     | 0.5033   | 0.3402  | 0.2244  | 0.3865        | -0.2324 | 1.0000  | 0.8526   | 0.2035   | 0.4096 | 0.5932 | 0.3443        | 0.5797 |        |                          |
| MD IPSI     | Synapsin      | 1.0000      | 0.8270   | 0.7657  | 0.9119  | 0.9611        | -0.1982 | 0.5735  |          | 0.0423   | 0.0759 | 0.0113 | 0.0022        | 0.7066 | 0.2340 |                          |
|             | Gephyrin      | 0.8270      | 1.0000   | 0.8921  | 0.9351  | 0.6544        | 0.3060  | 0.5306  | 0.0423   |          | 0.0168 | 0.0062 | 0.1585        | 0.5553 | 0.2788 |                          |
|             | PSD95         | 0.7657      | 0.8921   | 1.0000  | 0.9015  | 0.6388        | 0.4124  | 0.1531  | 0.0759   | 0.0168   |        | 0.0141 | 0.1722        | 0.4165 | 0.7722 |                          |
|             | UBE3A         | 0.9119      | 0.9351   | 0.9015  | 1.0000  | 0.7782        | 0.2074  | 0.5369  | 0.0113   | 0.0062   | 0.0141 |        | 0.0683        | 0.6934 | 0.2721 |                          |
|             | Synaptophysin | 0.9611      | 0.6544   | 0.6388  | 0.7782  | 1.0000        | -0.4126 | 0.4596  | 0.0022   | 0.1585   | 0.1722 | 0.0683 |               | 0.4162 | 0.3591 |                          |
|             | GluA2         | -0.1982     | 0.3060   | 0.4124  | 0.2074  | -0.4126       | 1.0000  | -0.2293 | 0.7066   | 0.5553   | 0.4165 | 0.6934 | 0.4162        |        | 0.6620 |                          |
|             | MBP           | 0.5735      | 0.5306   | 0.1531  | 0.5369  | 0.4596        | -0.2293 | 1.0000  | 0.2340   | 0.2788   | 0.7722 | 0.2721 | 0.3591        | 0.6620 |        |                          |
| MD CON      | Synapsin      | 1.0000      | 0.6040   | 0.6022  | 0.8131  | 0.2276        | 0.3930  | 0.7521  |          | 0.2042   | 0.2042 | 0.2059 | 0.0491        | 0.6645 | 0.0846 |                          |
|             | Gephyrin      | 0.6040      | 1.0000   | 0.9662  | 0.7053  | 0.5108        | 0.7493  | 0.8168  | 0.2042   |          | 0.0017 | 0.1175 | 0.3004        | 0.0864 | 0.0473 |                          |
|             | PSD95         | 0.6022      | 0.9662   | 1.0000  | 0.5621  | 0.6896        | 0.8299  | 0.8552  | 0.2059   | 0.0017   |        | 0.2456 | 0.1296        | 0.0409 | 0.0299 |                          |
|             | UBE3A         | 0.8131      | 0.7053   | 0.5621  | 1.0000  | -0.1050       | 0.2491  | 0.6184  | 0.0491   | 0.1175   | 0.2456 |        | 0.8431        | 0.6341 | 0.1907 |                          |
|             | Synaptophysin | 0.2276      | 0.5108   | 0.6896  | -0.1050 | 1.0000        | 0.7151  | 0.6627  | 0.6645   | 0.3004   | 0.1296 | 0.8431 |               | 0.1102 | 0.1515 |                          |
|             | GluA2         | 0.3930      | 0.7493   | 0.8299  | 0.2491  | 0.7151        | 1.0000  | 0.5268  | 0.4409   | 0.0864   | 0.0409 | 0.6341 | 0.1102        |        | 0.2829 |                          |
|             | MBP           | 0.7521      | 0.8168   | 0.8552  | 0.6184  | 0.6627        | 0.5268  | 1.0000  | 0.0846   | 0.0473   | 0.0299 | 0.1907 | 0.1515        | 0.2829 |        |                          |
| FLX MD IPSI | Synapsin      | 1.0000      | 0.1563   | -0.1698 | -0.1266 | -0.3116       | -0.0409 | -0.0128 |          | 0.7117   | 0.7117 | 0.6876 | 0.7652        | 0.4525 | 0.9760 |                          |
|             | Gephyrin      | 0.1563      | 1.0000   | 0.8097  | 0.3895  | 0.3005        | 0.1642  | 0.1596  | 0.7117   |          | 0.0149 | 0.3402 | 0.4696        | 0.6977 | 0.7058 |                          |
|             | PSD95         | -0.1698     | 0.8097   | 1.0000  | 0.2245  | 0.5416        | 0.3970  | 0.5560  | 0.6876   | 0.0149   |        | 0.5930 | 0.1656        | 0.3302 | 0.1524 |                          |
|             | UBE3A         | -0.1266     | 0.3895   | 0.2245  | 1.0000  | 0.7149        | -0.2191 | -0.1147 | 0.7652   | 0.3402   | 0.5930 |        | 0.0463        | 0.6022 | 0.7869 |                          |
|             | Synaptophysin | -0.3116     | 0.3005   | 0.5416  | 0.7149  | 1.0000        | -0.1070 | 0.3571  | 0.4525   | 0.4696   | 0.1656 | 0.0463 |               | 0.8010 | 0.3852 |                          |
|             | GluA2         | -0.0409     | 0.1642   | 0.3970  | -0.2191 | -0.1070       | 1.0000  | 0.5548  | 0.9235   | 0.6977   | 0.3302 | 0.6022 | 0.8010        |        | 0.1535 |                          |
|             | MBP           | -0.0128     | 0.1596   | 0.5560  | -0.1147 | 0.3571        | 0.5548  | 1.0000  | 0.9760   | 0.7058   | 0.1524 | 0.7869 | 0.3852        | 0.1535 |        |                          |
| FLX MD CON  | Synapsin      | 1.0000      | 0.5401   | 0.4506  | 0.4483  | 0.2184        | -0.0823 | 0.1759  |          | 0.1670   | 0.2625 | 0.2652 | 0.6033        | 0.8464 | 0.6769 |                          |
|             | Gephyrin      | 0.5401      | 1.0000   | 0.9892  | 0.9889  | 0.8194        | -0.1984 | 0.3298  | 0.1670   |          | 0.0000 | 0.0000 | 0.0128        | 0.6377 | 0.4250 |                          |
|             | PSD95         | 0.4506      | 0.9892   | 1.0000  | 0.9906  | 0.8335        | -0.1601 | 0.3816  | 0.2625   | 0.0000   |        | 0.0000 | 0.0101        | 0.7050 | 0.3509 |                          |
|             | UBE3A         | 0.4483      | 0.9889   | 0.9906  | 1.0000  | 0.8454        | -0.1687 | 0.3343  | 0.2652   | 0.0000   | 0.0000 |        | 0.0082        | 0.6896 | 0.4183 |                          |
|             | Synaptophysin | 0.2184      | 0.8194   | 0.8335  | 0.8454  | 1.0000        | -0.3026 | 0.3148  | 0.6033   | 0.0128   | 0.0101 | 0.0082 |               | 0.4664 | 0.4477 |                          |
|             | GluA2         | -0.0823     | -0.1984  | -0.1601 | -0.1687 | -0.3026       | 1.0000  | -0.0179 | 0.8464   | 0.6377   | 0.7050 | 0.6896 | 0.4664        |        | 0.9665 |                          |
|             | MBP           | 0.1759      | 0.3298   | 0.3816  | 0.3343  | 0.3148        | -0.0179 | 1.0000  | 0.6769   | 0.4250   | 0.3509 | 0.4183 | 0.4477        | 0.9665 |        |                          |

**Supplementary Datasheet S2. A Table of Pearson's R values corresponding to the correlation matrices presented in Figure 4.** The correlations between pairs of proteins for each of the treatment conditions presented in Figure 4. The corresponding p-values for the correlations are shown, and p-values below the False Discovery Rate (q = 0.10) are coloured red.
